# Supplementary material
Source: Royal Society of Chemistry journal article supplement (doi:10.1039/d5nr04366b)
Supplement: d5nr04366b1.pdf [file d5nr04366b1.pdf]

1     ***Targeting glutamine metabolism combined***  
2             ***with radiotherapy in radioresistant***  
3                     ***hepatocellular carcinoma***

4             Chia-Chun Kuo <sup>a,b,c,d</sup>, Yao Chen Chuang <sup>b</sup>, Ping-Hsiu Wu <sup>b,c,e</sup>, Wei-Min Chang <sup>f,g</sup>, , Leu-Wei Lo <sup>h</sup>,  
5     Hsuan-Yu Chen <sup>a,i</sup>, Kuen-Haur Lee <sup>a,j</sup>, Hsin-Lun Lee <sup>a,b,e,k,\*</sup>, Jeng-Fong Chiou <sup>b,c,e,j,\*</sup>, Yao-An Shen <sup>k,l,m,\*</sup>

6     a. Ph.D. Program for Cancer Molecular Biology and Drug Discovery, College of  
7     Medical Science and Technology, Taipei Medical University, Taipei 110301, Taiwan

8     b. Department of Radiation Oncology, Taipei Medical University Hospital, Taipei  
9     110301, Taiwan

10    c. TMU Proton Center, Taipei Medical University Hospital, Taipei 110301, Taiwan

11    d. School of Health Care Administration, College of Management, Taipei Medical  
12    University, Taipei 110301, Taiwan

13    e. Department of Radiology, School of Medicine, College of Medicine, Taipei  
14    Medical University, Taipei 110301, Taiwan

15    f. School of Oral Hygiene, College of Oral Medicine, Taipei Medical University,  
16    Taipei 110301, Taiwan

17    g. Research Center of Oral Translational Medicine, College of Oral Medicine, Taipei  
18    Medical University, Taipei 110301, Taiwan

19    h. Institute of Biomedical Engineering and Nanomedicine, National Health Research  
20    Institutes, Zhunan, Miaoli 35053, Taiwan

21    i. Institute of Statistical Science, Academia Sinica, Taipei 115201, Taiwan

22    j. Graduate Institute of Cancer Biology and Drug Discovery, College of Medical  
23    Science and Technology, Taipei Medical University, Taipei 110301, Taiwan

24    k. Graduate Institute of Clinical Medicine, College of Medicine, Taipei Medical  
25    University, Taipei 110301, Taiwan

26    l. Department of Pathology, School of Medicine, College of Medicine, Taipei Medical  
27    University, Taipei 110301, Taiwan

28    m. International Ph.D. Program in Medicine, College of Medicine, Taipei Medical  
29    University, Taipei 110301, Taiwan

30

31    \* *Author for equal contribution for corresponding author*

1 **Table S1. Characterization of the GNDs@gelatin NPs**

|                              | GNDs@gelatin      | GNDs@gelatin/DON |
|------------------------------|-------------------|------------------|
| Particle mean size (nm)      | 125.4 ± 16.3 nm   | 120.6 ± 11.4 nm  |
| PDI                          | 0.098 ± 0.019     | 0.093 ± 0.012    |
| Zeta potential (mV)          | -11.37 ± 0.42 mV, | -2.52 ± 0.32 mV  |
| Encapsulation efficiency (%) |                   | 66.5 %           |
| Drug loading (%)             |                   | 5.4 %            |

2

3

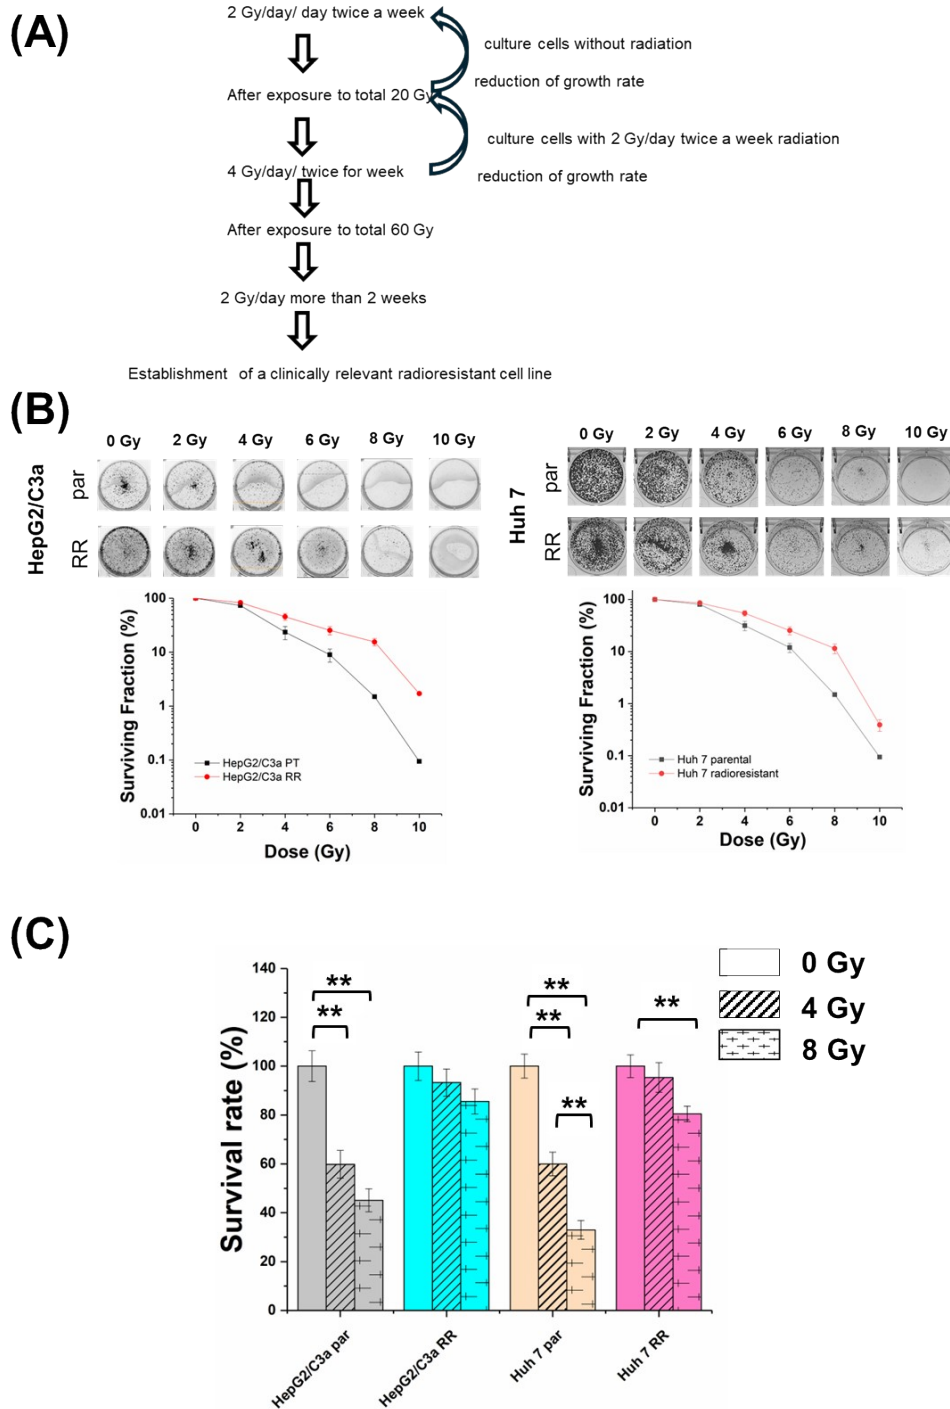

1

2 **Figure S1.** Establishment of clinically relevant radioresistant (CRR) hepatocellular  
 3 carcinoma cell lines. (A) Stepwise induction of CRR cell lines through incremental  
 4 increases in X-ray dose. (B) Clonogenic survival of parental HepG2/C3a and Huh7  
 5 (PT) cells compared with their CRR counterparts (RR). (C) Survival assays of HCC PT  
 6 and RR cells following 5 days of treatment with radiation and subsequent X-ray  
 7 exposure. Statistical significance was determined using Student's t-test; \* $p < 0.05$ , \*\* $p$   
 8  $< 0.01$ .

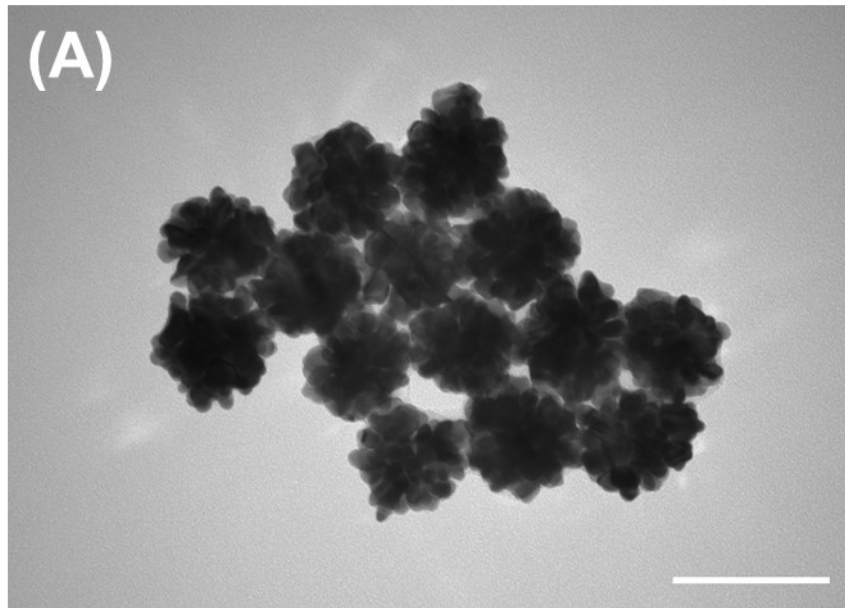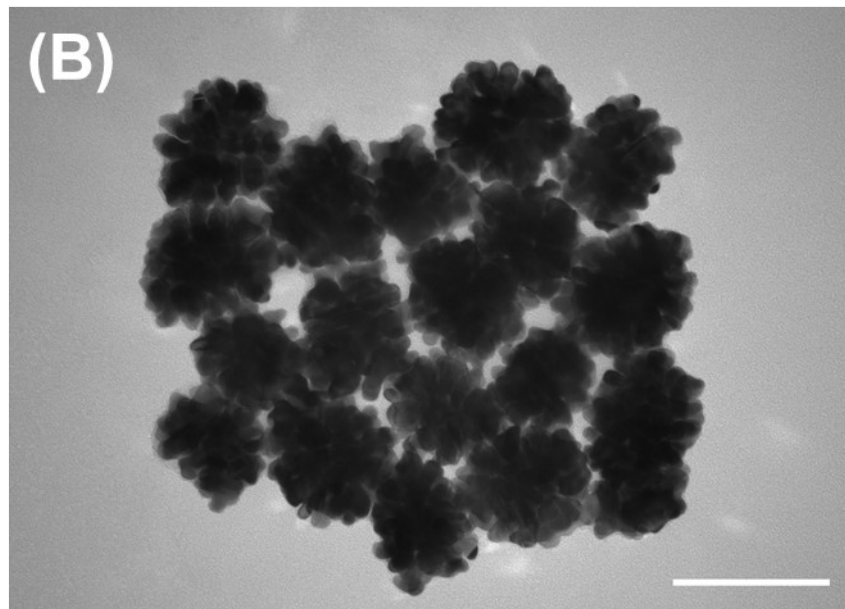

1

2 **Figure S2.** Corresponding TEM images of GNDs (A) before, and (B) after DON  
3 modification. TEM scale bars are 100 nm.

4

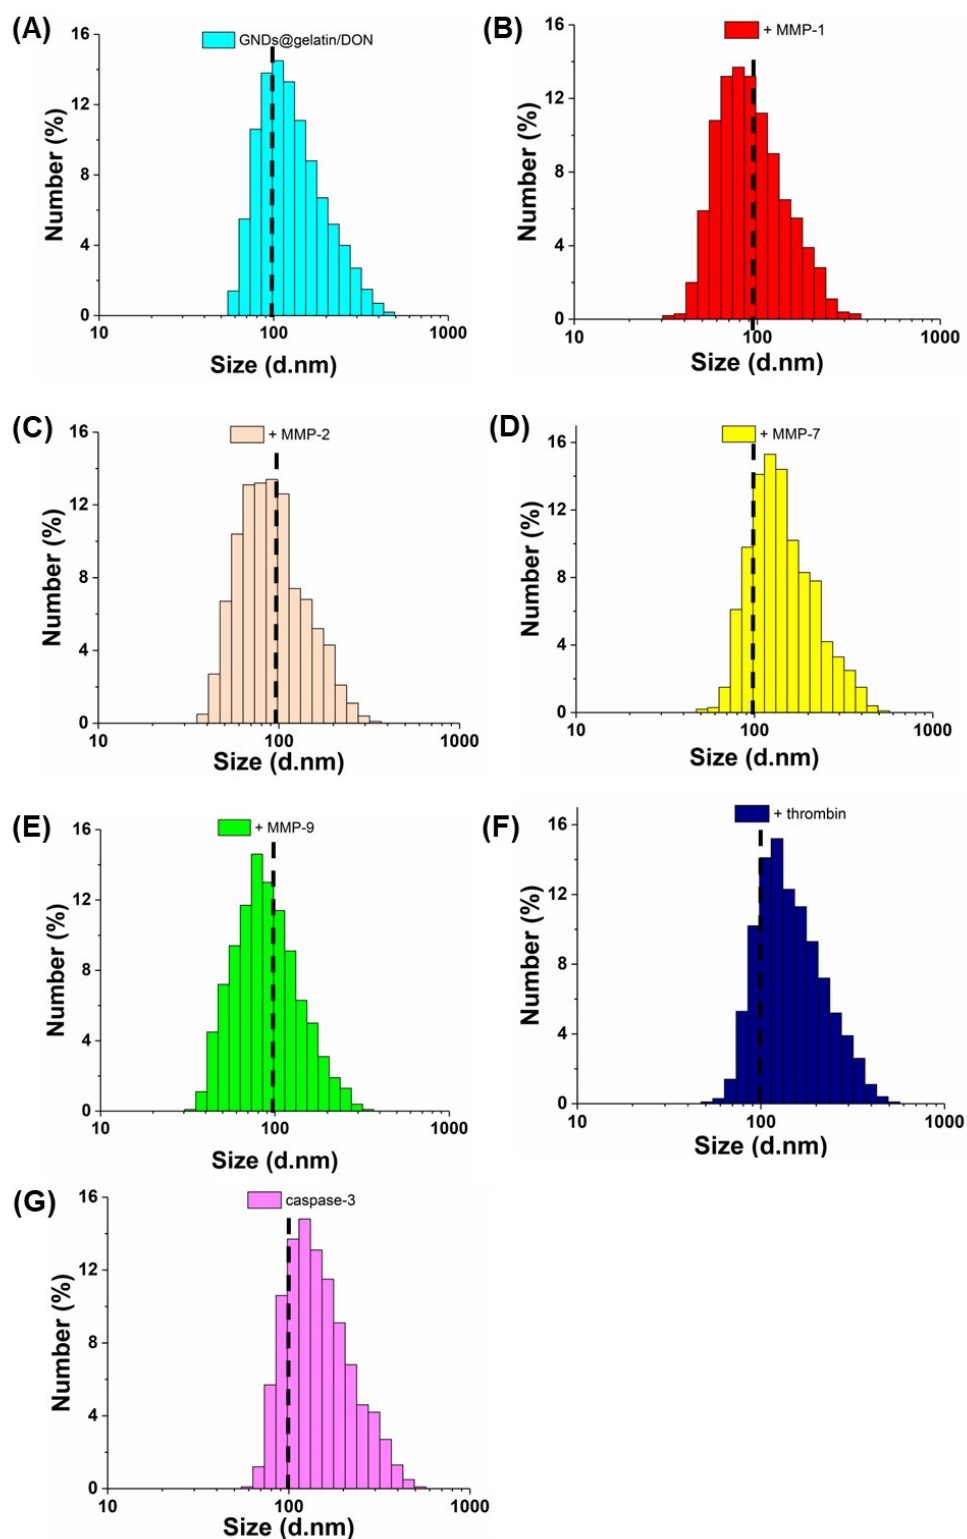

1

2 **Figure S3.** Characterization of protease-triggered shrinkage of GNDs@gelatin/DON.

3 Hydrodynamic size distributions of GNDs@gelatin/DON (A) before treatment and

4 after 6 h incubation at 37 °C with (B) MMP-1, (C) MMP-2, (D) MMP-7, (E) MMP-9,

1 (F) thrombin, and (G) caspase-3.

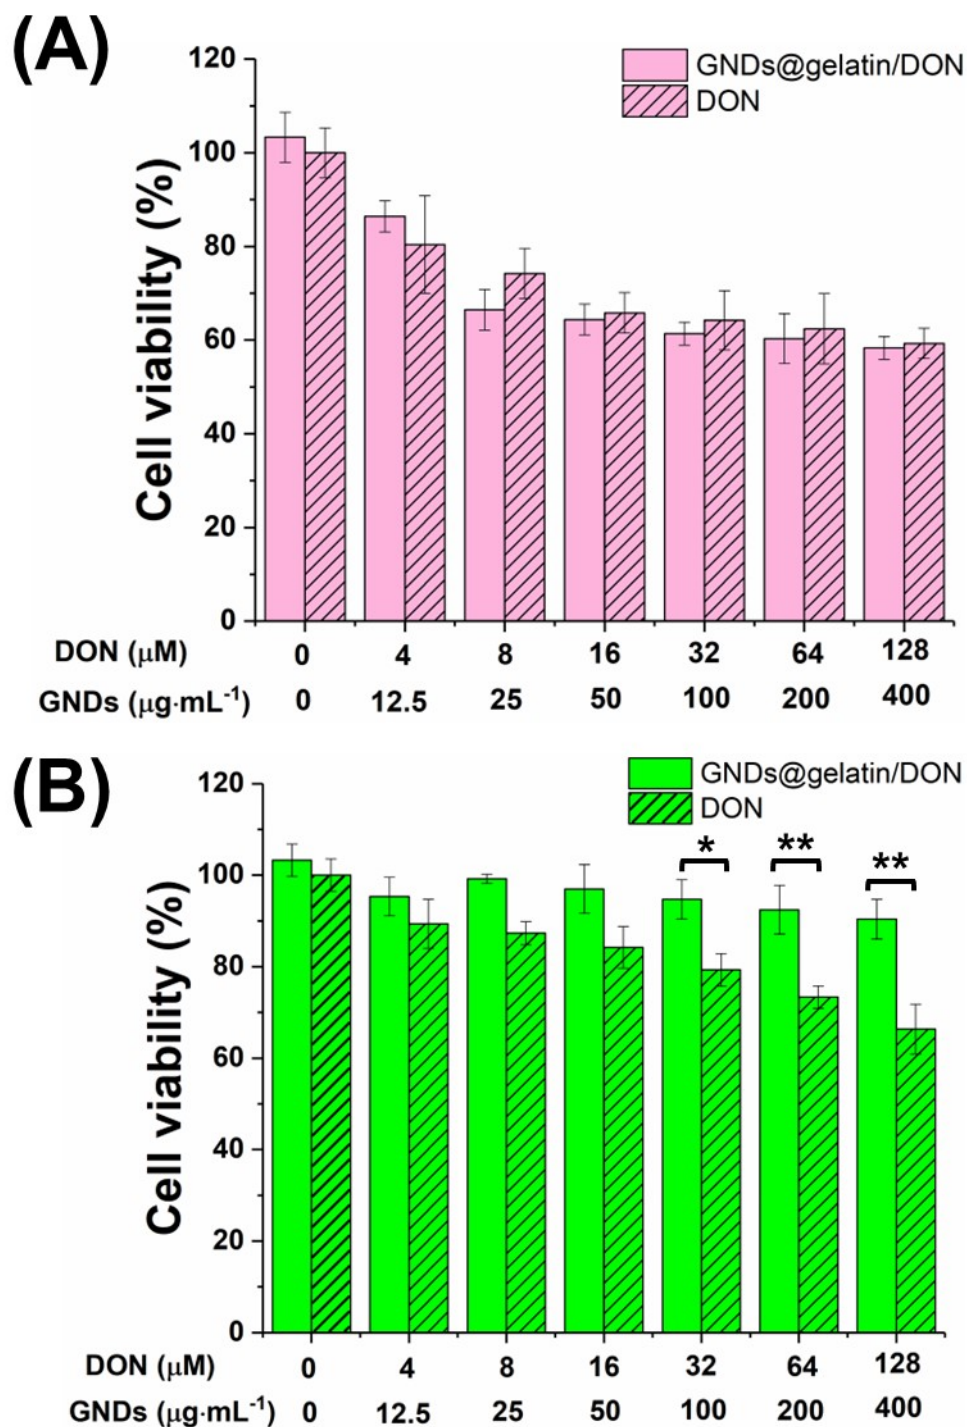

2

3 **Figure S4.** Cell viability of (A) Huh7 RR and (B) H-4-II-E cells after 48 h incubation  
4 with different concentrations of DON or GNDs@gelatin/DON. Data are expressed as  
5 mean ± SEM (n = 3). Statistical significance was determined using Student's *t*-test; \**p*  
6 < 0.05, \*\**p* < 0.01.



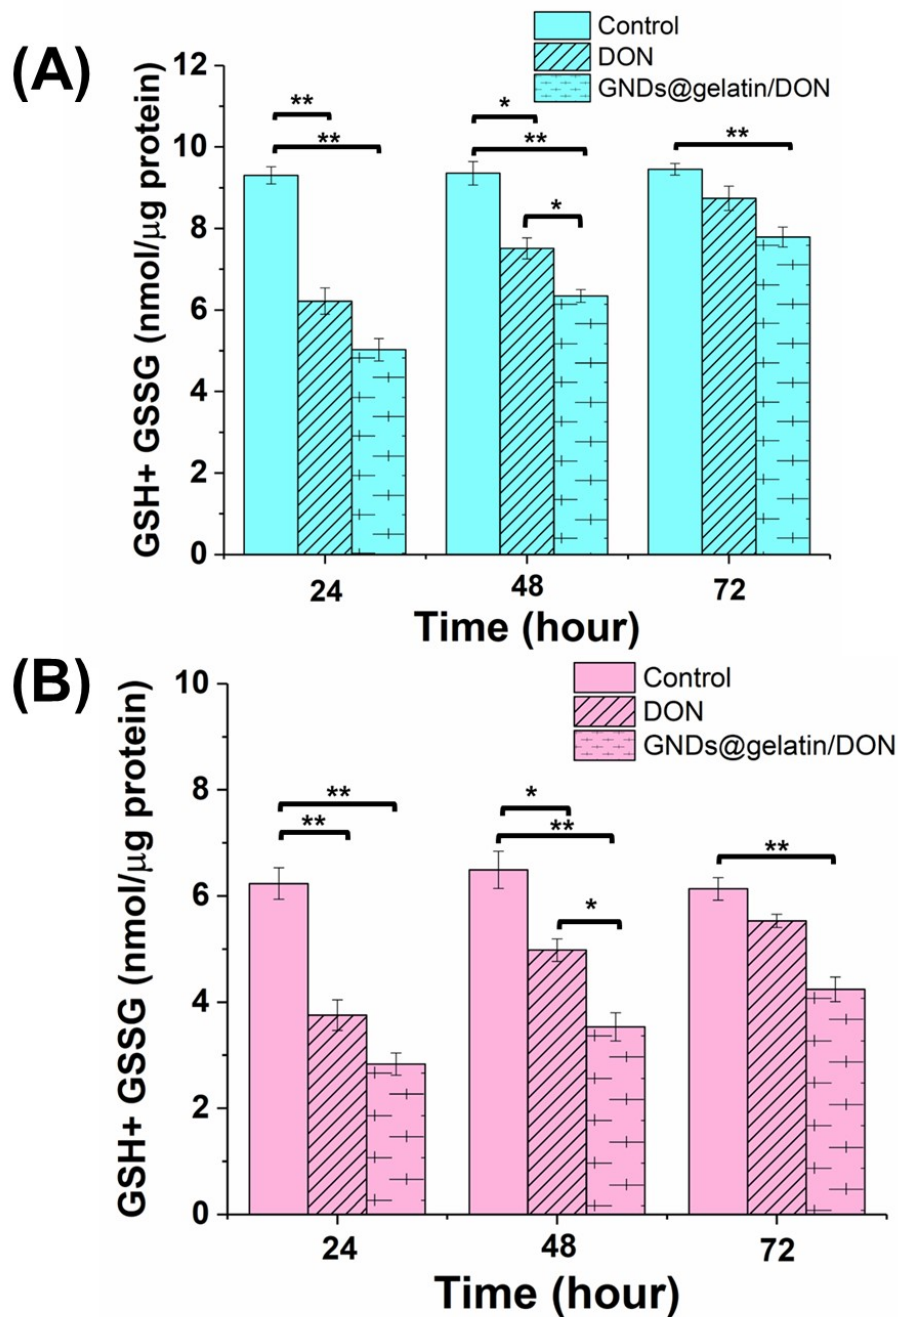

1

2 **Figure S5.** Effects of DON and GNDs@gelatin/DON on intracellular total glutathione.  
 3 (A) HepG2/C3a RR and (B) Huh7 RR cells were treated with DON or  
 4 GNDs@gelatin/DON, and total glutathione levels were quantified using the  
 5 GSH/GSSG assay at 24, 48, and 72 h post-treatment. Data are presented as mean ±  
 6 SEM (n = 3). Statistical significance was determined using Student's *t*-test; \**p* < 0.05,  
 7 \*\**p* < 0.01.

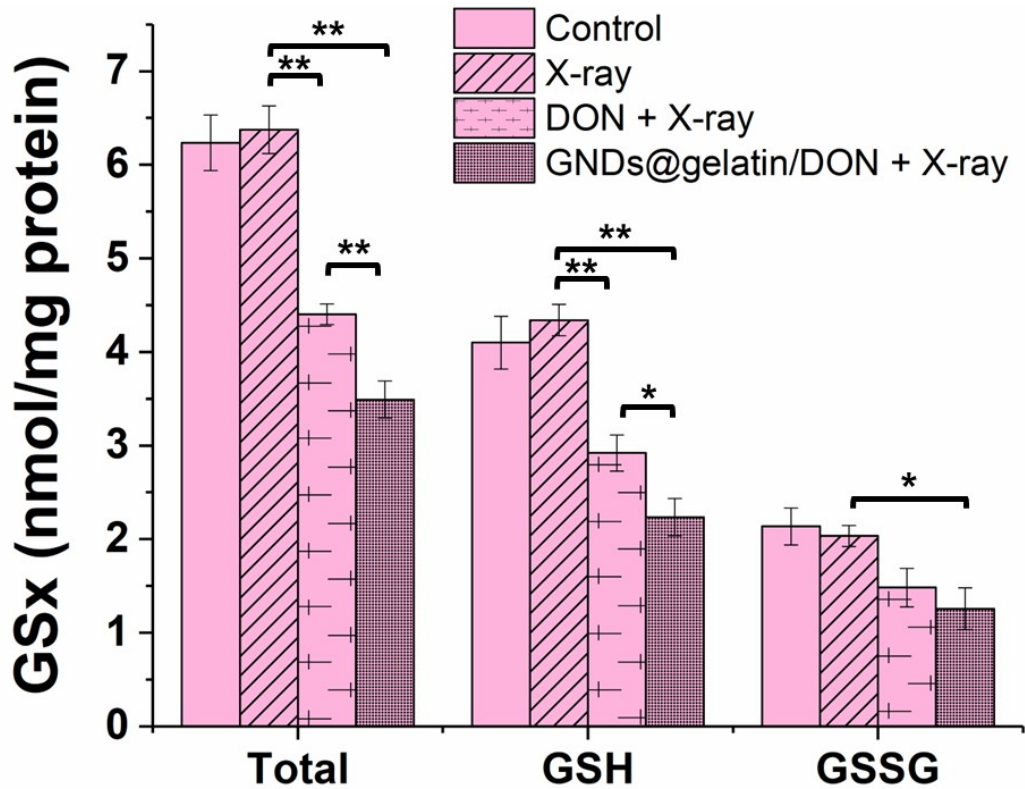

1

2 **Figure S6.** Effects of X-ray, DON, or GNDs@gelatin/DON, alone or in combination,  
 3 on total glutathione, GSH, and GSSG levels in Huh7 RR cells. Cells were treated with  
 4 8  $\mu\text{M}$  DON or 25  $\mu\text{g}\cdot\text{mL}^{-1}$  GNDs@gelatin/DON (equivalent to  $\sim 8 \mu\text{M}$  DON) for 24 h,  
 5 followed by 6 Gy 10 MV photon irradiation and an additional 24 h incubation at 37 °C.  
 6 Treated cells were then harvested for glutathione analysis. Data are presented as mean  
 7  $\pm$  SEM (n = 5). Statistical significance was determined using Student's *t*-test; \* $p < 0.05$ ,  
 8 \*\* $p < 0.01$ .

9

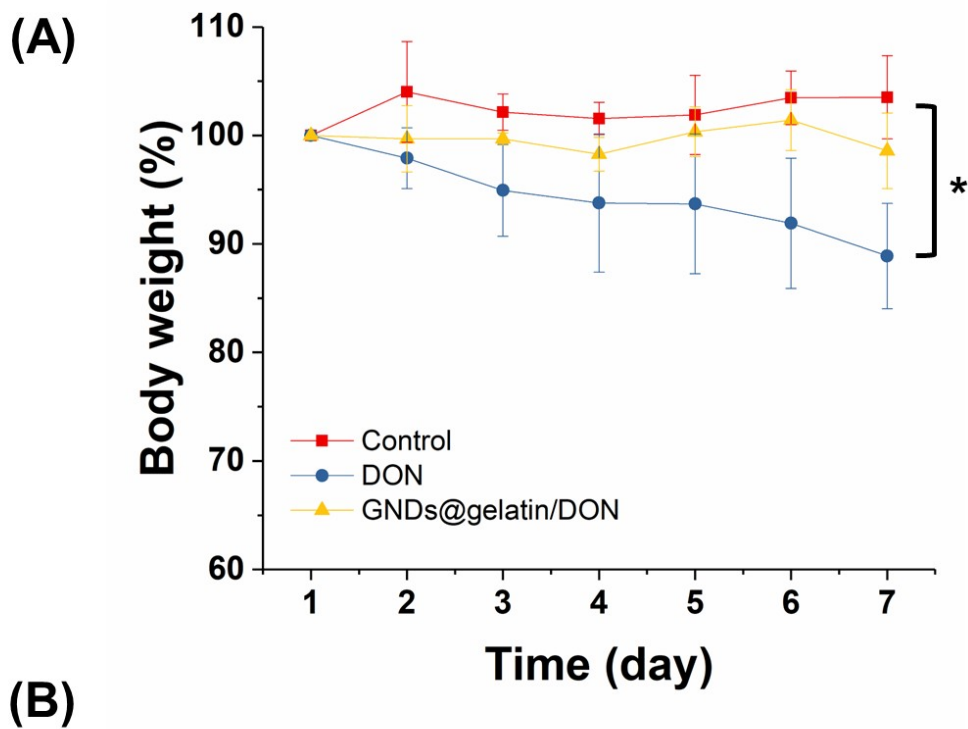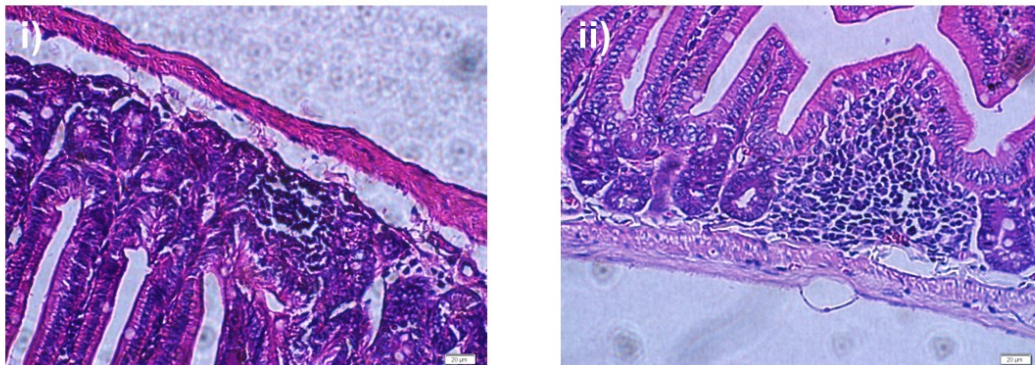

1

2 **Figure S7.** Evaluation of body weight changes, side effects, and selective reduction *in*  
 3 *vivo* following GNDs@gelatin/DON treatment. (A) Comparison of systemic toxicity  
 4 and side effects between free DON and GNDs@gelatin/DON. Data are presented as  
 5 mean  $\pm$  SEM (n = 4), and statistical significance was determined using Student's *t*-test.  
 6  $*p < 0.05$  (B) Representative H&E staining of gastrointestinal tissues from mice treated  
 7 for 7 days with (i) DON or (ii) GNDs@gelatin/DON.

8
